# Supplementary material for: Assessment of polydopamine coated magnetic nanoparticles in doxorubicin delivery
Source: Royal Society of Chemistry journal article supplement (doi:10.1039/c5ra24222c), 2016-01-01
Supplement: c5ra24222c1.pdf [file c5ra24222c1.pdf]

## Electronic Supplementary Information

### Assessment of Polydopamine Coated Magnetic Nanoparticles in Doxorubicin Delivery

Radosław Mrówczyński\*<sup>a</sup>, Anna Woźniak<sup>a</sup>, Roksana Markiewicz<sup>a</sup>, Emerson L. Coy<sup>a</sup>, Justyna Jurga-Stopa<sup>b</sup>, and Stefan Jurga<sup>a,c</sup>

- NanoBioMedical Centre at Adam Mickiewicz University, ul. Umultowska 85, 61-614 Poznań, Poland
- Department of Biomaterials and Experimental Dentistry, Poznan University of Medical Sciences ul. Fredry 7, Poznan, Poland
- Department of Macromolecular Physics, Faculty of Physics, Adam Mickiewicz University, ul. Umultowska 85, 61-614 Poznań, Poland

Correspondence to: [radoslaw.mrowczynski@amu.edu.pl](mailto:radoslaw.mrowczynski@amu.edu.pl), Radosław Mrówczyński

NanoBioMedical Centre, Adam Mickiewicz University, ul. Umultowska 85, PL 61614 Poznań, Poland

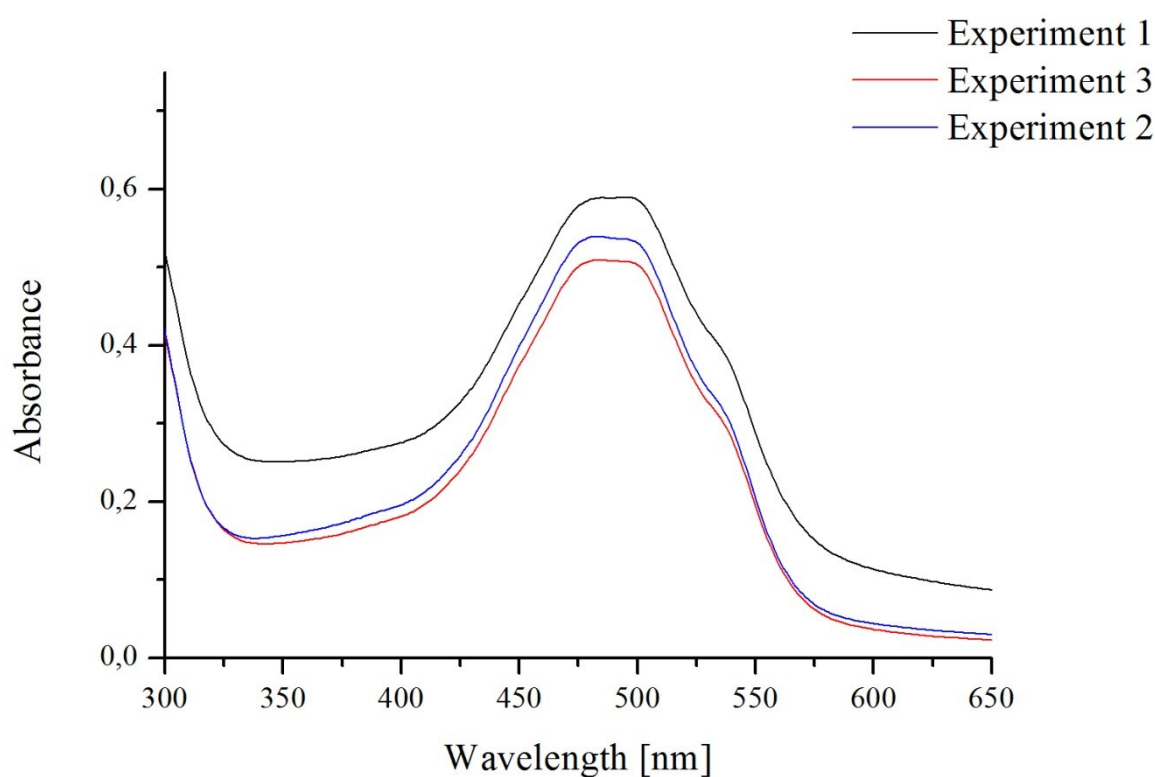

Fig. 1 UV-Vis spectra of doxorubicin in eluate after loading experiments

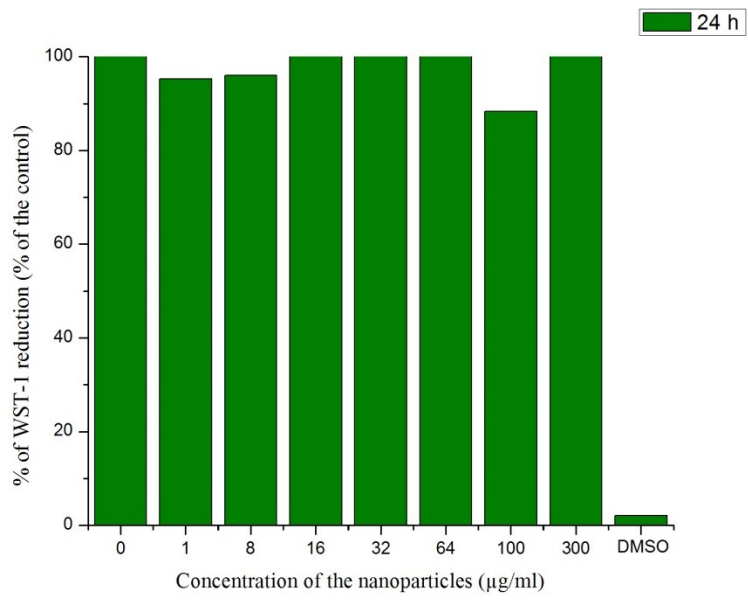

A

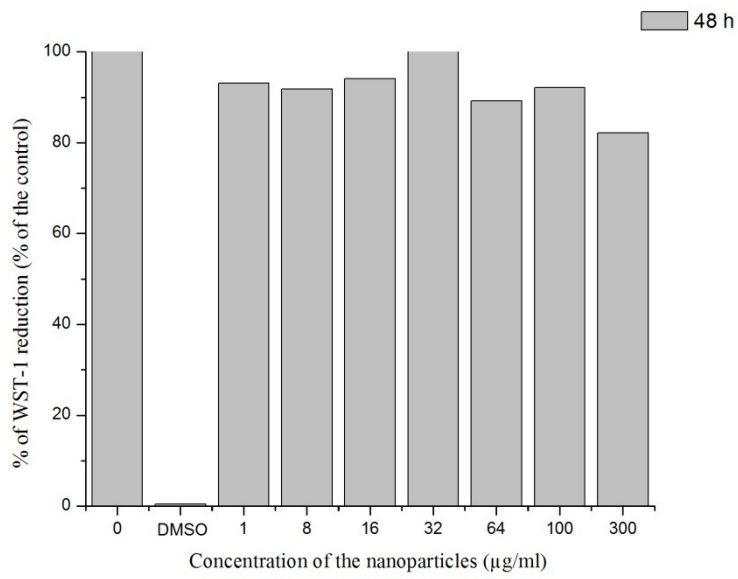

B

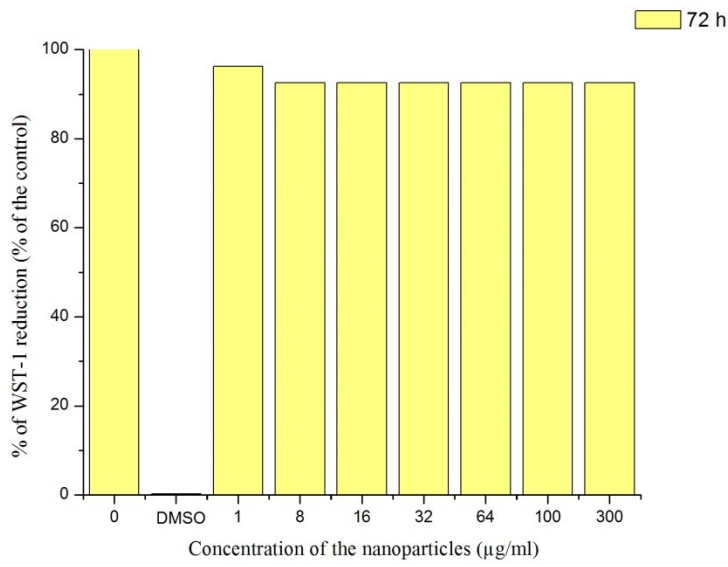

C

Fig.2 WST-1 reduction activity of the HeLa cell line after 24 h (a), 48 h (b) and 72h (c) of incubation with MNP 1 comparing to the control.

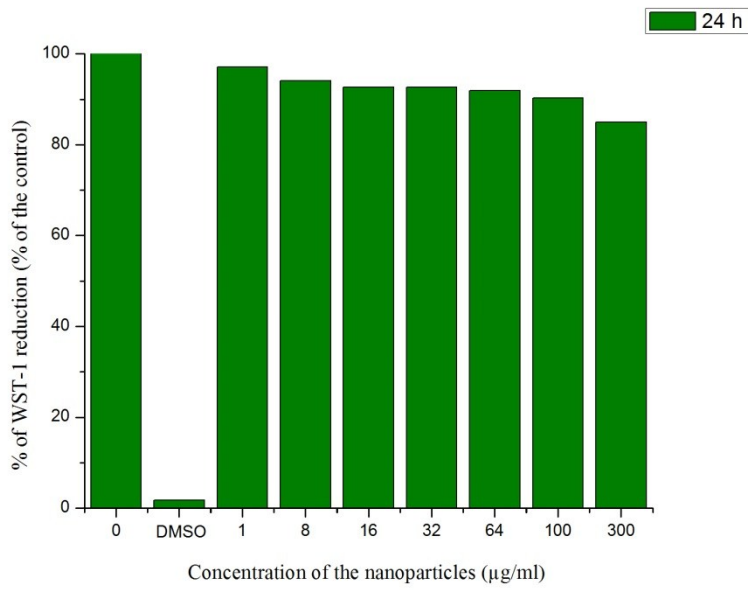

A

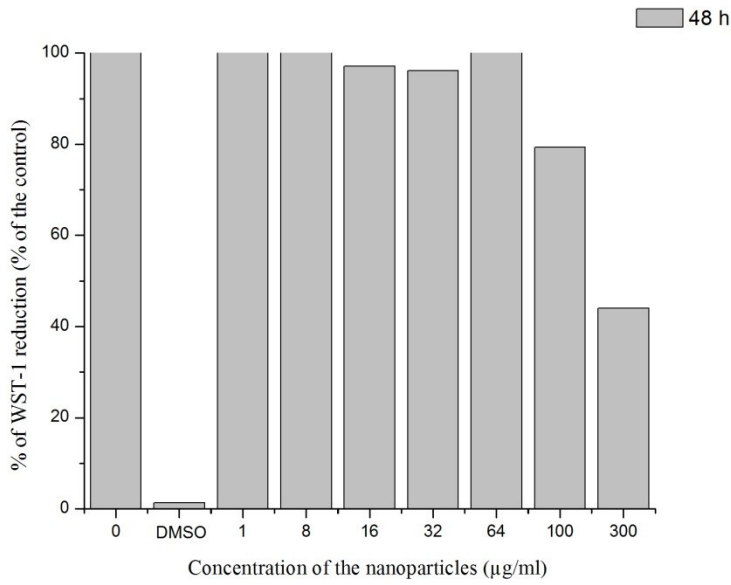

B

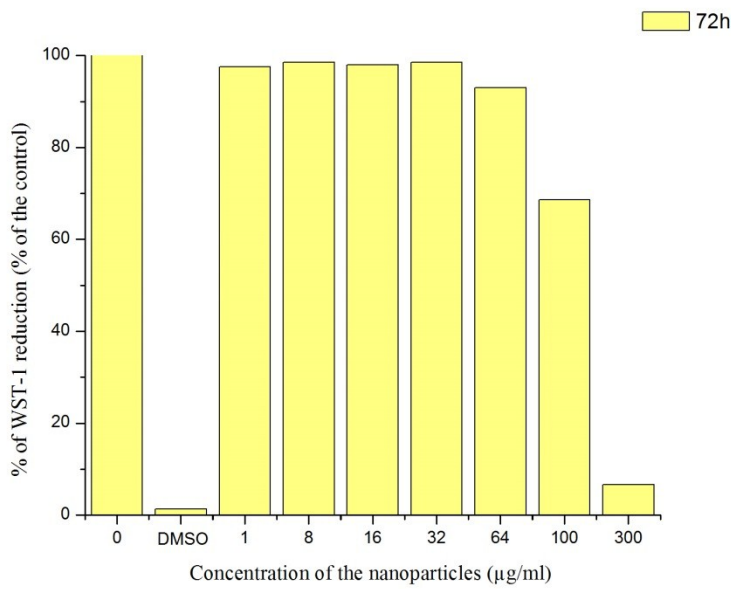

C

Fig.3 HeLa cell line viability after 24 h (a), 48 h (b), 72 h (c) of incubation with MNP 2 (WST-1 assay).

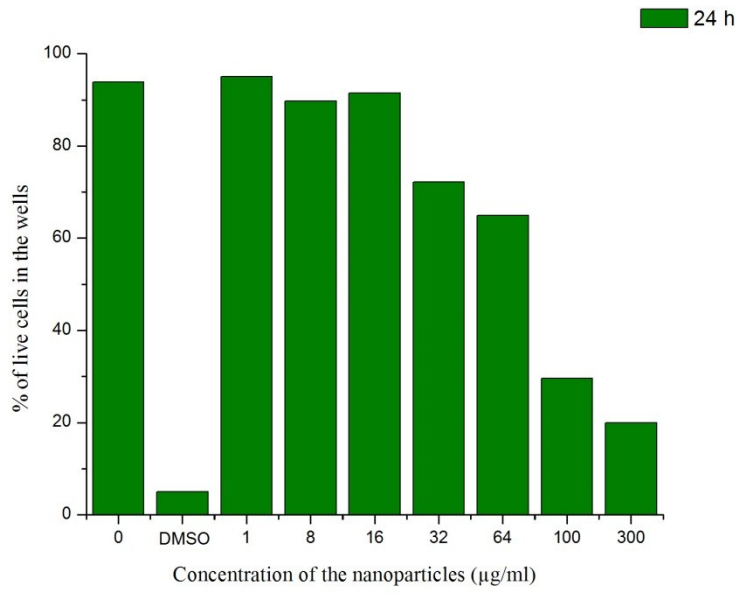

A

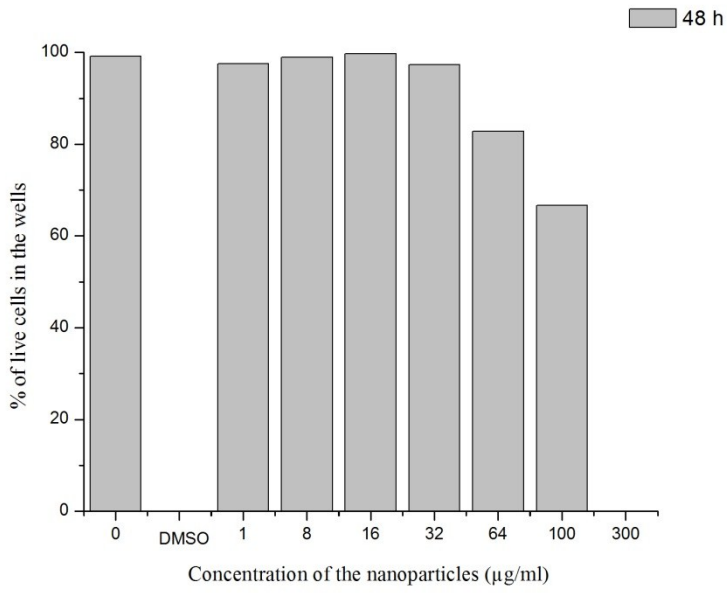

B

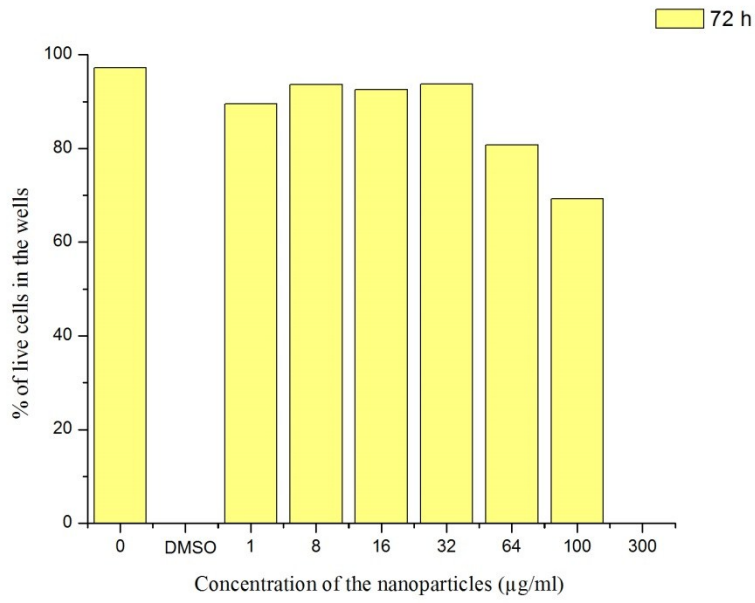

C

Fig. 4 Live/dead test results. % of live HeLa cells after 24 h (a), 48 h (b) and 72 h (c) of incubation with MNP 2
